# Supplementary material
Source: PubMed Central journal article supplement (PMC1578626)
Supplement: JCI0627331sd.pdf [file JCI0627331sd.pdf]

## SUPPLEMENTARY TABLES

### **Supplementary Table I: Transcriptional reporter plasmids derived from 5'-regulatory regions of genes.**

---

| <b><u>Promoter –Luciferase Constructs</u></b> | <b><u>5' Regulatory Region</u></b> | <b><u>Plasmid (R.E. Sites)</u></b> | <b><u>Description</u></b> |
|-----------------------------------------------|------------------------------------|------------------------------------|---------------------------|
| Mouse SP-A, <i>Sftpa</i> -0.45-luc            | -399/+45 bps                       | pGL3 (Hind III / Pst I)            | 1                         |
| Mouse SP-B, <i>Sftpb</i> -1.8-luc             | -1797/+42 bps                      | pGL3 (Hind III / Sal I)            | 2                         |
| Mouse SP-C, <i>Sftpc</i> -4.8-luc             | -4800/+18 bps                      | pGL2 (Xho I / Xho I)               | 3                         |
| Mouse Abca3, <i>Abca3</i> -2.6-luc            | -2591/+11                          | pGL3 (Kpn I / Xho I)               | This Study                |
| Mouse Foxa1, <i>Foxa1</i> -3.4-luc            | -3400/+47 bps                      | pGL3 (Sac I / Xma I)               | This Study                |
| Mouse Foxa2, <i>Foxa2</i> -1.6-luc            | -1529/+68                          | pGL3 (Nhe I / Hind III)            | 4                         |

---

### **Supplemental References for Table I**

1. Bruno, M.D., Korfhagen, T.R., Liu, C., Morrisey, E.E. & Whitsett, J.A. GATA-6 activates transcription of surfactant protein A. *J Biol Chem* **275**, 1043-9 (2000).
2. Sever-Chroneos, Z., Bachurski, C.J., Yan, C. & Whitsett, J.A. Regulation of mouse SP-B gene promoter by AP-1 family members. *Am J Physiol* **277**, L79-88 (1999).
3. Kelly, S.E., Bachurski, C.J., Burhans, M.S. & Glasser, S.W. Transcription of the lung-specific surfactant protein C gene is mediated by thyroid transcription factor 1. *J Biol Chem* **271**, 6881-8 (1996).
4. Kaestner, K.H., Montoliu, L., Kern, H., Thulke, M. & Schutz, G. Universal beta-galactosidase cloning vectors for promoter analysis and gene targeting. *Gene* **148**, 67-70 (1994).

## **Supplementary Table II: Oligonucleotides used in EMSA, ChIP and Real-Time PCR Assays.**

| <b>Oligonucleotide Name</b>                          | <b>Oligonucleotide Sequence</b>          |
|------------------------------------------------------|------------------------------------------|
| <b><u>Oligonucleotides Used in EMSA</u></b>          |                                          |
| <b><i>Abca3</i></b>                                  |                                          |
| NFAT-II Sense                                        | 5'-GTGTCACCTTTGGAAAAAAGT-3'              |
| NFAT-II Antisense                                    | 5'-GTGTACTTTTTTCCAAAGTG-3'               |
| NFAT-III Sense                                       | 5'-GGGTGATTCTGGAAAATACA-3'               |
| NFAT-III Antisense                                   | 5'-TGTGTGTATTTCCAGAATC-3'                |
| <b><i>Foxa1</i></b>                                  |                                          |
| NFAT-IV Sense                                        | 5'-GGTTTCTCTTTTTTTCCTTT-3'               |
| NFAT-IV Antisense                                    | 5'-GGTTAAAGGAAAAAAGAGAA-3'               |
| NFAT-V Sense                                         | 5'-GGTTCCTTTTTTTCCTTTTCT-3'              |
| NFAT-V Antisense                                     | 5'-GGTTAGAAAAGGAAAAAAG-3'                |
| NFAT-VI Sense                                        | 5'-GGTTCCTATTTTTCTTTTCT-3'               |
| NFAT-VI Antisense                                    | 5'-GGTTAGAAAAGGAAAAATAGG-3'              |
| <b><i>IL-2</i></b>                                   |                                          |
| IL-2 Sense                                           | 5'-CAATTGGAAAATTTTAT-3'                  |
| IL-2 Antisense                                       | 5'-TGATAAAAATTTTCCAAT-3'                 |
| <b><i>rTg</i></b>                                    |                                          |
| TTF-1 Sense                                          | 5'-CACTGCCCAGTCAAGTGTCTTGAACA-3'         |
| TTF-1 Antisense                                      | 5'-TGTTCAAGAACACTTGACTGGGCAGTG-3'        |
| <b><u>Oligonucleotides Used in ChIP</u></b>          |                                          |
| <i>Sfipb</i> Promoter (Forward)                      | 5'-AAACAAAAAAGCAGATCTCGTG-3'             |
| <i>Sfipb</i> Promoter (Reverse)                      | 5'-CCCCCTTACTTAAAAATCCTCTGA-3'           |
| <i>Abca3</i> Promoter (Forward)                      | 5'-TGAAGGAACCACAACCCCT-3'                |
| <i>Abca3</i> Promoter (Reverse)                      | 5'-AGGCTGTAACATCAAGAATCTCACTT-3'         |
| <i>Gapdh</i> Promoter (Forward)                      | 5'-ATTTATGGCCACATCCCTAAG-3'              |
| <i>Gapdh</i> Promoter (Reverse)                      | 5'-TTTGTCTACGGGACGAGGCT-3'               |
| <b><u>Oligonucleotides Used in Real-Time PCR</u></b> |                                          |
| <i>Pla2g1b</i> cDNA Primer (Forward)                 | 5'-CAGGCGCTGCTGCACACAG-3'                |
| <i>Pla2g1b</i> cDNA Primer (Reverse)                 | 5'-GTC TAA GTC GTC CAC TGG GGT GC-3',    |
| <i>Aytl2</i> cDNA(Forward)                           | 5'-GGC TCC ACA TTC CTC CTC CTA CTT TG-3' |
| <i>Aytl2</i> cDNA(Reverse)                           | 5'-ATC TCC TCC ACT GTC TTC CTT CG- 3'    |
| <i>β-actin</i> (Forward)                             | 5'-TGG AAT CCT GTG GCA TCC ATG AAA C-3'  |
| <i>β-actin</i> (Forward)                             | 5'-TAA AAC GCA GCT CAG TAA CAG TCC G-3'. |

Supplementary Table III: Differentially expressed genes in lungs of mice after deletion of *Cnb1* vs. control littermates.

| Systematic  | common        | genebank  | Ratio  | T-Test     | description                                                                                 | GO Bio                                                                                                                        |
|-------------|---------------|-----------|--------|------------|---------------------------------------------------------------------------------------------|-------------------------------------------------------------------------------------------------------------------------------|
| 1429626_at  | Sfltpa1       | NM_023134 | -43.09 | 0.00000449 | Surfactant-associated protein A1                                                            | phosphate transport; regulation of liquid surface tension; respiratory gaseous exchange                                       |
| 1415964_at  | Scd1          | NM_009127 | -25.22 | 0.00000839 | Stearoyl-Coenzyme A desaturase 1                                                            | fatty acid biosynthesis                                                                                                       |
| 1418190_at  | Pon1          | NM_011134 | -15.02 | 0.000402   | Paraoxonase 1                                                                               | cholesterol metabolism; circulation; response to toxin                                                                        |
| 1418818_at  | Aqp5          | NM_009701 | -13.60 | 7.14E-07   | Aquaporin 5                                                                                 | transport; water transport                                                                                                    |
| 1458719_at  | Bltd9         | NM_172618 | -7.81  | 0.000761   | BTB (POZ) domain containing 9                                                               | cell adhesion                                                                                                                 |
| 1449015_at  | Retnla        | NM_020509 | -7.37  | 0.000469   | Resistin like alpha                                                                         |                                                                                                                               |
| 1419407_at  | Hc            | NM_010406 | -5.02  | 0.00307    | Hemolytic complement                                                                        | complement activation; complement activation, alternative pathway; complement activation, classical pathway; cytolysis        |
| 1416854_at  | Slc34a2       | NM_011402 | -4.92  | 0.00138    | Solute carrier family 34 (sodium phosphate), member 2                                       | phosphate transport                                                                                                           |
| 1426215_at  | Ddc           | NM_016672 | -4.66  | 0.000074   | Dopa decarboxylase                                                                          | amino acid and derivative metabolism; amino acid metabolism; catecholamine biosynthesis                                       |
| 1417388_at  | Bex2          | NM_009749 | -4.25  | 0.0000486  | Brain expressed X-linked 2                                                                  |                                                                                                                               |
| 1460470_at  | Acox1         | NM_028765 | -4.20  | 0.0000219  | Acyl-Coenzyme A oxidase-like                                                                | protein targeting                                                                                                             |
| 1448964_at  | S100g         | NM_009789 | -4.12  | 0.0034     | S100 calcium binding protein G                                                              |                                                                                                                               |
| 1451359_at  | BC005662      | NM_145376 | -3.96  | 0.00000849 | CDNA sequence BC005662                                                                      | muscle development; phospholipid biosynthesis                                                                                 |
| 1460258_at  | Lect1         | NM_010701 | -3.75  | 0.00176    | Leukocyte cell derived chemotaxin 1                                                         |                                                                                                                               |
| 1418108_at  | Plekhh1       | NM_133244 | -3.67  | 0.000442   | synonyms: Mbf, RTKN2, B130039D23Rik; membrane bound factor                                  | 8284 // positive regulation of cell proliferation // inferred from direct assay // 30097 // hemopoiesis                       |
| 1440849_at  | 6330417G04Rik | BE647762  | -3.66  | 0.0000693  | RAS protein-specific guanine nucleotide-releasing factor 2                                  |                                                                                                                               |
| 1429076_a_a | Gdgd2         | NM_023608 | -3.53  | 0.000348   | Glycerophosphodiester phosphodiesterase domain containing 2                                 | glycerol metabolism                                                                                                           |
| 1448397_at  | Gjtb6         | NM_008128 | -3.51  | 0.000343   | Gap junction membrane channel protein beta 6                                                | cell communication; cell-cell signaling; ear morphogenesis; perception of sound                                               |
| 1446764_at  | Wnt3a         | C77101    | -3.50  | 0.00132    | Wingless-related MMTV integration site 3A                                                   | 16055 // Wnt receptor signaling pathway // inferred from electronic annotation                                                |
| 1447845_s_a | Vnn1          | NM_011704 | -2.94  | 0.00514    | Vanin 1                                                                                     | nitrogen compound metabolism                                                                                                  |
| 1450371_at  | Tshb          | NM_009432 | -2.63  | 0.00569    | Thyroid stimulating hormone, beta subunit                                                   |                                                                                                                               |
| 1416200_at  | 9230117N10Rik | NM_133775 | -2.63  | 0.0083     | RIKEN cDNA 9230117N10 gene                                                                  | biological_process unknown                                                                                                    |
| 1437028_at  | Sfltba        | NM_147779 | -2.57  | 0.00827    | Surfactant associated protein B                                                             | lipid metabolism; regulation of liquid surface tension; respiratory gaseous exchange; sphingolipid metabolism                 |
| 1431788_at  | 1700008G05Rik | BC030910  | -2.52  | 0.0013     | RIKEN cDNA 1700008G05 gene                                                                  |                                                                                                                               |
| 1424479_at  | Cst8          | NM_009978 | -2.50  | 0.00863    | Cystatin 8 (cystatin-related epididymal spermatogenic)                                      |                                                                                                                               |
| 1444480_at  | Prkag3        | NM_153744 | -2.49  | 0.00315    | Protein kinase, AMP-activated, gamma 3 non-catalytic subunit                                |                                                                                                                               |
| 1430792_at  | Wwir1         | AK014334  | -2.47  | 0.0205     | WW domain containing transcription regulator 1                                              | protein amino acid phosphorylation                                                                                            |
| 1441050_at  | 5730526G10Rik | AK042046  | -2.46  | 0.00399    | RIKEN cDNA 5730526G10 gene                                                                  |                                                                                                                               |
| 1417070_at  | Cyp4v3        | NM_133969 | -2.45  | 0.00342    | Kallikrein B, plasma 1                                                                      | biological_process unknown                                                                                                    |
| 1435610_at  | C130034118Rik | NM_177233 | -2.41  | 0.00939    | RIKEN cDNA C130034118 gene                                                                  |                                                                                                                               |
| 1460238_at  | Msln          | NM_018857 | -2.38  | 0.00126    | Mesothelin                                                                                  |                                                                                                                               |
| 1452270_s_a | Cubn          | XM_130038 | -2.35  | 0.0000145  | Cubilin (intrinsic factor-cobalamin receptor)                                               | receptor mediated endocytosis; tRNA aminoacylation for protein translation                                                    |
| 1425496_at  | Abca3         | NM_013855 | -2.33  | 0.000673   | ATP-binding cassette, sub-family A (ABC1), member 3                                         | transport                                                                                                                     |
| 1449152_at  | Cdkn2b        | NM_007670 | -2.32  | 0.000816   | Cyclin-dependent kinase inhibitor 2B (p15, inhibits CDK4)                                   | cell cycle; negative regulation of cell cycle; regulation of transcription, DNA-dependent                                     |
| 1423367_at  | Wnt7a         | NM_009527 | -2.30  | 0.000504   | Wingless-related MMTV integration site 7A                                                   | Wnt receptor signaling pathway; cell-cell signaling; development; embryonic limb morphogenesis; frizzled-2 signaling          |
| 1422550_a_a | Mtap6         | NM_010837 | -2.26  | 0.00071    | Microtubule-associated protein 6                                                            | microtubule-based process                                                                                                     |
| 1429355_at  | 3300001K11Rik | XM_156349 | -2.22  | 0.0116     | RIKEN cDNA 3300001K11 gene                                                                  |                                                                                                                               |
| 1448949_at  | Car4          | NM_007607 | -2.18  | 0.00251    | Carbonic anhydrase 4                                                                        | one-carbon compound metabolism                                                                                                |
| 1446007_at  | Bmp1          | BM231135  | -2.17  | 0.00039    | Bone morphogenetic protein 1                                                                | 9887 // organogenesis // inferred from electronic annotation                                                                  |
| 1458381_at  | Cllic5        | NM_172621 | -2.17  | 0.000106   | Chloride intracellular channel 5                                                            | chloride transport; ion transport                                                                                             |
| 1449939_s_a | Dlk1          | NM_010052 | -2.14  | 0.000167   | Delta-like 1 homolog (Drosophila)                                                           |                                                                                                                               |
| 1442752_at  | Opcml         | CF579117  | -2.14  | 0.00741    | Opioid binding protein/cell adhesion molecule-like                                          | 7155 // cell adhesion // inferred from electronic annotation                                                                  |
| 1456793_at  | 4930443F05Rik | BC063103  | -2.11  | 0.0108     | Cytokine like 1                                                                             |                                                                                                                               |
| 1427747_a_a | Lcn2          | NM_008491 | -2.09  | 0.0242     | Lipocalin 2                                                                                 | transport                                                                                                                     |
| 1435026_at  | Spock2        | NM_052994 | -2.05  | 0.000829   | Sparc/osteonectin, cwcv and kazal-like domains proteoglycan 2                               |                                                                                                                               |
| 1417933_at  | Igfbbp6       | NM_008344 | -2.04  | 0.000134   | Insulin-like growth factor binding protein 6                                                | regulation of cell growth                                                                                                     |
| 1452320_at  | Lrp2          | NM_130308 | -2.04  | 0.00669    | Low density lipoprotein receptor-related protein 2                                          | 6766 // vitamin metabolism // inferred from mutant phenotype // 6898 // receptor mediated endocytosis                         |
| 1451287_s_a | 2810003C17Rik | NM_145144 | -2.02  | 0.000598   | RIKEN cDNA 2810003C17 gene                                                                  |                                                                                                                               |
| 1419079_at  | Scnn1g        | NM_011326 | -2.01  | 0.000925   | Sodium channel, nonvoltage-gated 1 gamma                                                    | ion transport; sodium ion transport                                                                                           |
| 1422983_at  | Iltgb6        | NM_021359 | -2.00  | 0.0012     | Integrin beta 6                                                                             | cell adhesion; cell-matrix adhesion; integrin-mediated signaling pathway                                                      |
| 1447301_at  |               | XM_138063 | -1.99  | 0.000333   | Gene model 258, (NCBI)                                                                      |                                                                                                                               |
| 1456922_at  | 4933437K13Rik | NM_028964 | -1.99  | 0.0217     | RIKEN cDNA 4933437K13 gene                                                                  | 7242 // PX; intracellular signaling cascade; 1.6e-13 // extended: Unknown                                                     |
| 1442587_at  | C130076O07Rik | AK051190  | -1.94  | 0.0383     | RIKEN cDNA C130076O07 gene                                                                  | 7155 // cell adhesion // inferred from electronic annotation                                                                  |
| 1451857_a_a | 5730593N15Rik | NM_175263 | -1.93  | 0.00127    | RIKEN cDNA 5730593N15 gene                                                                  |                                                                                                                               |
| 1429953_at  | 2210011C24Rik | AA030229  | -1.93  | 0.0045     | RIKEN cDNA 2210011C24 gene                                                                  |                                                                                                                               |
| 1456392_at  | Negr1         | NM_177274 | -1.92  | 0.00164    | Neuronal growth regulator 1                                                                 | cell adhesion                                                                                                                 |
| 1457548_at  | Adams16       | AK030315  | -1.92  | 0.00186    | A disintegrin-like and metalloprotease (repolyrin type) with thrombospondin type 1 motif, 6 |                                                                                                                               |
| 1442067_at  | Ror1          | BU512899  | -1.92  | 0.00105    | Receptor tyrosine kinase-like orphan receptor 1                                             | 7275 // development // inferred from electronic annotation                                                                    |
| 1449166_at  | S100a14       | NM_025393 | -1.91  | 0.00303    | S100 calcium binding protein A14                                                            |                                                                                                                               |
| 1451674_at  | Slc12a5       | NM_020333 | -1.90  | 0.000788   | Solute carrier family 12, member 5                                                          | amino acid transport; chloride transport; ion transport; potassium ion transport; sodium ion transport; synaptic transmission |
| 1421821_at  | Ldlr          | NM_010700 | -1.89  | 0.00155    | Low density lipoprotein receptor                                                            | cholesterol homeostasis; cholesterol metabolism; endocytosis; lipid transport                                                 |

|              |               |            |       |           |                                                                                    |                                                                                                                         |
|--------------|---------------|------------|-------|-----------|------------------------------------------------------------------------------------|-------------------------------------------------------------------------------------------------------------------------|
| 1450029_s_at | IlgA9         | NM_133721  | -1.88 | 0.00166   | Integrin alpha 9                                                                   | cell adhesion; cell-matrix adhesion; integrin-mediated signaling pathway                                                |
| 1429123_at   | Rab27a        | NM_023635  | -1.88 | 0.000255  | RAB27A, member RAS oncogene family                                                 | blood coagulation; protein transport; small GTPase mediated signal transduction; vesicle-mediated transport             |
| 1419647_a_at | Ier3          | NM_133662  | -1.85 | 0.00202   | Immediate early response 3                                                         |                                                                                                                         |
| 1417408_at   | F3            | NM_010171  | -1.85 | 0.00985   | Coagulation factor III                                                             | blood coagulation                                                                                                       |
| 1432885_at   | 4632432E15Rik | AK014604   | -1.85 | 0.00739   | RIKEN full-length enriched library, clone:4632432E15                               |                                                                                                                         |
| 1431300_at   | 3110007P09Rik | NM_144906  | -1.84 | 0.0114    | RIKEN cDNA 3110007P09 gene                                                         |                                                                                                                         |
| 1418778_at   | 9030408N13Rik | NM_025779  | -1.84 | 0.00336   | RIKEN cDNA 9030408N13 gene                                                         |                                                                                                                         |
| 1458934_at   | D5Ert0505e    | BG068094   | -1.83 | 0.0119    | Mus musculus cDNA clone H3061F11 3', mRNA sequence.                                |                                                                                                                         |
| 1423647_a_at | Zdhhc3        | NM_026917  | -1.81 | 0.0000568 | Zinc finger, DHHC domain containing 3                                              | protein targeting; proteolysis and peptidolysis                                                                         |
| 1438511_a_at | 1190002H23Rik | NM_025427  | -1.80 | 0.0000236 | RIKEN cDNA A130038J17 gene                                                         | cell cycle                                                                                                              |
| 1417611_at   | Tmem37        | NM_019432  | -1.80 | 0.00517   | Transmembrane protein 37                                                           | ion transport                                                                                                           |
| 1449455_at   | Hck           | NM_010407  | -1.80 | 0.000637  | Hemopoietic cell kinase                                                            | intracellular signaling cascade; protein amino acid phosphorylation                                                     |
| 1417821_at   | D17H6S56E-5   | NM_033075  | -1.80 | 0.00132   | DNA segment, Chr 17, human D6S56E 5                                                |                                                                                                                         |
| 1439790_at   | Serpnb9       | NM_009256  | -1.79 | 0.00122   | Serine (or cysteine) proteinase inhibitor, clade B, member 9                       |                                                                                                                         |
| 1430306_a_at | Alp6v1c2      | NM_133699  | -1.79 | 0.00178   | ATPase, H+ transporting, V1 subunit C, isoform 2                                   | proton transport                                                                                                        |
| 1451416_a_at | Tgm1          | NM_019984  | -1.78 | 0.00168   | Transglutaminase 1, K polypeptide                                                  | organogenesis; peptide cross-linking; protein metabolism; protein modification                                          |
| 1441467_at   | Tm4s9         | BB307636   | -1.78 | 0.0103    | Transmembrane 4 superfamily member 9                                               | 7155 // cell adhesion // inferred from sequence or structural similarity                                                |
| 1456487_at   | D11Bwg1392e   | BC050125   | -1.77 | 0.00399   | Adenylyl cyclase 1                                                                 | adenylyl cyclase activation; cAMP biosynthesis; cyclic nucleotide biosynthesis; intracellular signaling cascade         |
| 1420955_at   | Vsn1          | NM_012038  | -1.77 | 0.0343    | Visinin-like 1                                                                     |                                                                                                                         |
| 1436142_at   | 3526401B18Rik | AK014386   | -1.77 | 0.0000167 | RIKEN cDNA 3526401B18 gene                                                         |                                                                                                                         |
| 1439045_x_at | Mlac2d1       | NM_028924  | -1.76 | 0.000951  | Membrane targeting (tandem) C2 domain containing 1                                 | transport                                                                                                               |
| 1433184_at   | Cacna1c       | AK020162   | -1.76 | 0.000448  | Calcium channel, voltage-dependent, L type, alpha 1C subunit                       |                                                                                                                         |
| 1459713_s_at | AU040576      | NM_178642  | -1.76 | 0.00282   | Expressed sequence AU040576                                                        |                                                                                                                         |
| 1422790_at   | Nppc          | NM_010933  | -1.75 | 0.0189    | Natriuretic peptide precursor type C                                               | cGMP biosynthesis                                                                                                       |
| 1421093_at   | Slc7a10       | NM_017394  | -1.75 | 0.0427    | Solute carrier family 7 (cationic amino acid transporter, y+ system), member 10    | amino acid transport; neutral amino acid transport                                                                      |
| 1439311_at   | B830012L14Rik | AK053394   | -1.75 | 0.00849   | RIKEN cDNA B830012L14 gene                                                         |                                                                                                                         |
| 1418639_at   | Sftpc         | NM_011359  | -1.73 | 0.00112   | Surfactant associated protein C                                                    | regulation of liquid surface tension; respiratory gaseous exchange                                                      |
| 1430012_at   | 1110050K14Rik | AK087264   | -1.73 | 0.000699  | RIKEN cDNA 1110050K14 gene                                                         |                                                                                                                         |
| 1448365_at   | 2610002K22Rik | NM_025568  | -1.72 | 0.000402  | RIKEN cDNA 2610002K22 gene                                                         | 6364 // rRNA processing // inferred from electronic annotation // 6396 // RNA processing                                |
| 1444845_at   | Scfd1         | AK129238   | -1.72 | 0.00854   | Sec1 family domain containing 1                                                    | 15031 // protein transport // inferred from electronic annotation                                                       |
| 1439819_at   | Clsc          | BG070233   | -1.72 | 0.00195   | Cathepsin C                                                                        | 6508 // proteolysis and peptidolysis // inferred from electronic annotation                                             |
| 1450224_at   | Col4a3        | NM_007734  | -1.72 | 0.000924  | Procollagen, type IV, alpha 3                                                      | cell adhesion                                                                                                           |
| 1421786_at   | Ppp3r1        | NM_024459  | -1.71 | 0.000904  | Protein phosphatase 3, regulatory subunit B, alpha isoform (calcineurin B, type I) | epithelial to mesenchymal transition; heart development                                                                 |
| 1429286_at   | 1190003M12Rik | BE864968   | -1.71 | 0.00246   | RIKEN cDNA 1190003M12 gene                                                         |                                                                                                                         |
| 1422256_at   | Sstr2         | NM_009217  | -1.70 | 0.00501   | Somatostatin receptor 2                                                            | G-protein coupled receptor protein signaling pathway; G-protein signaling, adenylyl cyclase inhibiting pathway          |
| 1450276_a_at | Scin          | NM_009132  | -1.69 | 0.0135    | Scinderin                                                                          |                                                                                                                         |
| 1420847_a_at | Fgfr2         | NM_010207  | -1.69 | 0.000133  | Fibroblast growth factor receptor 2                                                | bone mineralization; cell-cell signaling; positive regulation of cell proliferation; protein amino acid phosphorylation |
| 1456481_at   | D9Ert0280e    | NM_177775  | -1.69 | 0.0166    | DNA segment, Chr 9, ERATO Doi 280, expressed                                       |                                                                                                                         |
| 1418464_at   | Matn4         | NM_013592  | -1.68 | 0.00166   | Matriin 4                                                                          |                                                                                                                         |
| 1436987_at   | 5430433G21Rik | AK044859   | -1.68 | 0.000621  | RIKEN cDNA 5430433G21 gene                                                         |                                                                                                                         |
| 1425272_at   | Emp2          | NM_007929  | -1.68 | 0.00248   | Epithelial membrane protein 2                                                      |                                                                                                                         |
| 1421404_at   | Cxcl15        | NM_011339  | -1.66 | 0.0106    | Chemokine (C-X-C motif) ligand 15                                                  | chemotaxis; hemopoiesis; immune response; inflammatory response; neutrophil chemotaxis; signal transduction             |
| 1422804_at   | Serpnb6b      | NM_011454  | -1.66 | 0.000145  | Serine (or cysteine) proteinase inhibitor, clade B, member 6b                      |                                                                                                                         |
| 1415916_a_at | Mthfd1        | NM_138745  | -1.65 | 0.000606  | Methylenetetrahydrofolate dehydrogenase (NADP+ dependent)                          | amino acid biosynthesis; folic acid and derivative biosynthesis; histidine biosynthesis; histidine catabolism;          |
| 1429292_a_at | 2310046K01Rik | NM_027172  | -1.65 | 0.00345   | RIKEN cDNA 2310046K01 gene                                                         |                                                                                                                         |
| 1415823_at   | Scd2          | NM_009128  | -1.65 | 0.000113  | Stearoyl-Coenzyme A desaturase 2                                                   | fatty acid biosynthesis; lipid biosynthesis                                                                             |
| 1434733_at   | Slk36         | NM_172657  | -1.64 | 0.00195   | synonyms: FU, MGS58023, B930045J24, 1700112N14Rik;                                 | 6468 // protein amino acid phosphorylation // inferred from sequence or structural similarity                           |
| 1457589_at   | D430038H04Rik | BC030299   | -1.64 | 0.00445   | RIKEN cDNA D430038H04 gene                                                         |                                                                                                                         |
| 1424408_at   | Lims2         | NM_144862  | -1.64 | 0.00783   | Expressed sequence AI853548                                                        |                                                                                                                         |
| 1456344_at   | Tnc           | NM_011607  | -1.64 | 0.0321    | Tenascin C                                                                         | biological_process unknown                                                                                              |
| 1460454_at   | 2010001H14Rik | NM_027227  | -1.64 | 0.00599   | RIKEN cDNA 2010001H14 gene                                                         |                                                                                                                         |
| 1432418_a_at | Ckml1         | NM_009897  | -1.64 | 0.0191    | Creatine kinase, mitochondrial 1, ubiquitous                                       |                                                                                                                         |
| 1422603_at   | Rnase4        | NM_021472  | -1.64 | 0.0000156 | Ribonuclease, RNase A family 4                                                     |                                                                                                                         |
| 1425831_at   | Zfp101        | NM_009542  | -1.63 | 0.0211    | Zinc finger protein 101                                                            |                                                                                                                         |
| 1431094_at   | Rll1          | XM_356599  | -1.63 | 0.00183   | Mus musculus retrotransposon-like 1 (Rll1), mRNA.                                  |                                                                                                                         |
| 1450082_s_at | Etv5          | NM_023794  | -1.63 | 0.0157    | Ets variant gene 5                                                                 | organogenesis                                                                                                           |
| 1434794_at   | Rhof          | NM_175092  | -1.63 | 0.0000433 | Ras homolog gene family, member f                                                  | actin filament organization; small GTPase mediated signal transduction                                                  |
| 1442494_at   | E130209G04Rik | AW519757   | -1.63 | 0.00313   | Ubiquitin protein ligase E3 component n-recogrin 2                                 | 7141 // male meiosis I // inferred from mutant phenotype                                                                |
| 1425970_a_at | Ros1          | NM_011282  | -1.62 | 0.00201   | Ros1 proto-oncogene                                                                | cellular physiological process; protein amino acid phosphorylation; regulation of cell cycle                            |
| 1452993_at   | 5430416O09Rik | NM_027789  | -1.62 | 0.0186    | RIKEN cDNA 5430416O09 gene                                                         |                                                                                                                         |
| 1448136_at   | Enpp2         | NM_015744  | -1.62 | 0.00167   | Ectonucleotide pyrophosphatase/phosphodiesterase 2                                 | nucleotide metabolism                                                                                                   |
| 1458635_at   | 4832428D23Rik | NM_0207281 | -1.62 | 0.0208    | RIKEN cDNA 4832428D23 gene                                                         |                                                                                                                         |
| 1457198_at   | Nrp           | AA673443   | -1.62 | 0.000633  | Mus musculus cDNA clone IMAGE:1024249 5', mRNA sequence.                           |                                                                                                                         |
| 1436398_at   | Lef1          | AK084363   | -1.62 | 0.000401  | Lymphoid enhancer binding factor 1                                                 | 16055 // Wnt receptor signaling pathway // inferred from electronic annotation                                          |

|              |               |           |       |           |                                                                                        |                                                                                                                              |
|--------------|---------------|-----------|-------|-----------|----------------------------------------------------------------------------------------|------------------------------------------------------------------------------------------------------------------------------|
| 1417178_at   | Semcap2       | NM_016867 | -1.62 | 0.00694   | SemaF cytoplasmic domain associated protein 2                                          | 7242 // PDZ:intracellular signaling cascade;1.5e-06 // extended:Unknown                                                      |
| 1422837_at   | Scel          | NM_022886 | -1.61 | 0.000831  | Sciellin                                                                               |                                                                                                                              |
| 1419435_at   | Aox1          | NM_009676 | -1.61 | 0.0106    | Aldehyde oxidase 1                                                                     | electron transport                                                                                                           |
| 1436070_at   | 1110008E19Rik | CB248061  | -1.61 | 0.00267   | RIKEN cDNA 8030475D13 gene [Mus musculus]                                              |                                                                                                                              |
| 1433959_at   | 9630048M01Rik | NM_177086 | -1.61 | 0.0197    | RIKEN cDNA 9630048M01 gene                                                             | mRNA processing: nuclear mRNA splicing, via spliceosome                                                                      |
| 1418489_a_at | Calcr1        | NM_018782 | -1.61 | 0.000657  | Calcitonin receptor-like                                                               | G-protein coupled receptor protein signaling pathway                                                                         |
| 1440847_at   | Mlss1         | NM_144800 | -1.60 | 0.00502   | Metastasis suppressor 1                                                                | actin filament organization: actin filament polymerization                                                                   |
| 1421375_a_at | S100a6        | NM_011313 | -1.60 | 0.000591  | S100 calcium binding protein A6 (calcyclin)                                            | cell cycle: cell proliferation: regulation of cell cycle                                                                     |
| 1444810_at   | Acac          | CA526571  | -1.60 | 0.00991   | Hypothetical protein E130101M22                                                        |                                                                                                                              |
| 1444266_at   | Hod           | CA976946  | -1.60 | 0.024     | Hypothetical protein E130218H05                                                        | 7507 // heart development // inferred from mutant phenotype                                                                  |
| 1454678_s_at | A130022J15Rik | NM_175313 | -1.59 | 0.0018    | RIKEN cDNA A130022J15 gene                                                             |                                                                                                                              |
| 1443300_at   | Notch3        | NM_008716 | -1.59 | 0.00442   | Notch gene homolog 3 (Drosophila)                                                      | cell differentiation: development: regulation of development: regulation of transcription, DNA-dependent                     |
| 1457935_at   | Sdcccag33l    | AK029270  | -1.59 | 0.0147    | Serologically defined colon cancer antigen 33 like                                     |                                                                                                                              |
| 1423174_a_at | Pard6b        | NM_021409 | -1.59 | 0.00216   | Par-6 (partitioning defective 6) homolog beta (C. elegans)                             | cell cycle: cytokinesis: intracellular signaling cascade                                                                     |
| 1429298_at   | Ddah1         | NM_026993 | -1.59 | 0.00311   | Dimethylarginine dimethylaminohydrolase 1                                              | nitric oxide biosynthesis: protein amino acid nitrosylation                                                                  |
| 1451236_at   | Rerg          | NM_181988 | -1.59 | 0.00203   | RAS-like, estrogen-regulated, growth-inhibitor                                         |                                                                                                                              |
| 1456547_at   | Ski           | CA872770  | -1.58 | 0.00408   | Sloan-Kettering viral oncogene homolog                                                 | 30326 // embryonic limb morphogenesis // inferred from mutant phenotype                                                      |
| 1424109_a_at | Glo1          | NM_025374 | -1.58 | 0.00664   | Glyoxalase 1                                                                           | carbohydrate metabolism                                                                                                      |
| 1418478_at   | Lmo1          | NM_057173 | -1.58 | 0.00131   | LIM domain only 1                                                                      | cell proliferation: cellular physiological process: development                                                              |
| 1436520_at   | na            | XM_356601 | -1.58 | 0.0265    | Similar to KIAA2019 protein (LOC382641), mRNA                                          |                                                                                                                              |
| 1440091_at   | Mrg1          | NM_010825 | -1.57 | 0.00032   | Myeloid ecotropic viral integration site-related gene 1                                | eye morphogenesis: regulation of transcription, DNA-dependent                                                                |
| 1424567_at   | 6330415F13Rik | NM_027533 | -1.57 | 0.00174   | RIKEN cDNA 6330415F13 gene                                                             |                                                                                                                              |
| 1441972_at   | 6230424C14Rik | AK078961  | -1.57 | 0.0208    | RIKEN cDNA 6230424C14 gene                                                             |                                                                                                                              |
| 1449308_at   | C6            | NM_016704 | -1.57 | 0.022     | Complement component 6                                                                 | complement activation                                                                                                        |
| 1439426_x_at | Lzp-s         | NM_013590 | -1.56 | 0.00572   | P lysozyme structural                                                                  | carbohydrate metabolism: cell wall catabolism: cytolysis: defense response to bacteria                                       |
| 1425834_a_at | Gpam          | NM_008149 | -1.56 | 0.000259  | Glycerol-3-phosphate acyltransferase, mitochondrial                                    | fatty acid metabolism: phospholipid biosynthesis: positive regulation of body size                                           |
| 1460194_at   | Phyh          | NM_010726 | -1.56 | 0.000467  | Phytanoyl-CoA hydroxylase                                                              | fatty acid alpha-oxidation                                                                                                   |
| 1434292_at   | A930034L06Rik | NM_175692 | -1.56 | 0.00257   | RIKEN cDNA A930034L06 gene                                                             |                                                                                                                              |
| 1441058_at   | Itpkb         | AK050506  | -1.56 | 0.0133    | Inositol 1,4,5-trisphosphate 3-kinase B                                                | MAPKKK cascade: T-cell differentiation: cell surface receptor linked signal transduction: positive regulation of Ras protein |
| 1433471_at   | Tcf7          | NM_009331 | -1.56 | 0.000856  | Transcription factor 7, T-cell specific                                                | Wnt receptor signaling pathway: regulation of apoptosis: regulation of cell proliferation: regulation of transcription       |
| 1444767_at   | Gnas          | AK076536  | -1.56 | 0.00802   | RIKEN cDNA A930027G11 gene                                                             |                                                                                                                              |
| 1419578_at   | Mbl1          | NM_010775 | -1.55 | 0.000794  | Mannose binding lectin, liver (A)                                                      | complement activation, classical pathway: phosphate transport                                                                |
| 1449476_at   | Rage          | NM_011973 | -1.55 | 0.00138   | Renal tumor antigen                                                                    | protein amino acid phosphorylation                                                                                           |
| 1431364_a_at | 2810047C21Rik | BC026878  | -1.55 | 0.0415    | RIKEN cDNA 2810047C21 gene                                                             |                                                                                                                              |
| 1433743_at   | Dach1         | NM_007826 | -1.55 | 0.00004   | Dachshund 1 (Drosophila)                                                               | development: regulation of transcription: regulation of transcription, DNA-dependent                                         |
| 1423006_at   | Pim1          | NM_008842 | -1.55 | 0.0164    | Proviral integration site 1                                                            | protein amino acid phosphorylation                                                                                           |
| 1442845_at   | 2810489O06Rik | AK085840  | -1.55 | 0.00041   | RIKEN cDNA 2810489O06 gene                                                             |                                                                                                                              |
| 1426758_s_at | Gli2          | NM_144513 | -1.55 | 0.00199   | GTL2, imprinted maternally expressed untranslated mRNA                                 |                                                                                                                              |
| 1446715_at   | Abca13        | AY160971  | -1.55 | 0.0202    | ATP-binding cassette, sub-family A (ABC1), member 13                                   | protein targeting: transport                                                                                                 |
| 1450822_at   | Lyzs          | NM_017372 | -1.54 | 0.0106    | Lysozyme                                                                               | carbohydrate metabolism: cell wall catabolism: cytolysis: defense response to bacteria                                       |
| 1441013_at   | C130089K02Rik | BE952079  | -1.54 | 0.00833   | RIKEN cDNA C130089K02 gene                                                             |                                                                                                                              |
| 1454806_at   | D12Erd553e    | NM_029758 | -1.54 | 0.000886  | DNA segment, Chr 12, ERATO Doi 553, expressed                                          |                                                                                                                              |
| 1445148_at   | Akr1b3        | AK049014  | -1.54 | 0.00966   | Aldo-keto reductase family 1, member B3 (aldose reductase)                             |                                                                                                                              |
| 1453055_at   | Sema6d        | NM_172537 | -1.54 | 0.00181   | Sema domain, transmembrane domain (TM), and cytoplasmic domain, (semaphorin) 6D        | development: neurogenesis                                                                                                    |
| 1416203_at   | Aqp1          | NM_007472 | -1.53 | 0.00193   | Aquaporin 1                                                                            | transport: water transport                                                                                                   |
| 1445535_at   | D8Erd594e     | BG063117  | -1.53 | 0.0144    | DNA segment, Chr 8, ERATO Doi 594, expressed                                           |                                                                                                                              |
| 1459947_at   | Txndc5        | AK028958  | -1.53 | 0.015     | Thioredoxin domain containing 5                                                        | 30509 // BMP signaling pathway // inferred from direct assay                                                                 |
| 1440635_at   | 2410003B16Rik | BB534971  | -1.53 | 0.0256    | RIKEN cDNA 2410003B16 gene                                                             |                                                                                                                              |
| 1457030_at   | Mirg          | AK077315  | -1.53 | 0.000704  | MIRNA containing gene                                                                  |                                                                                                                              |
| 1434582_at   | D14Erd171e    | NM_177814 | -1.53 | 0.00169   | DNA segment, Chr 14, ERATO Doi 171, expressed                                          |                                                                                                                              |
| 1420417_at   | Sema3a        | NM_009152 | -1.53 | 0.0102    | Sema domain, immunoglobulin domain (Ig), short basic domain, secreted, (semaphorin) 3A | development: negative regulation of axon extension; neurogenesis                                                             |
| 1445395_at   | Al875142      | BM932656  | -1.53 | 0.00149   | Expressed sequence Al875142                                                            |                                                                                                                              |
| 1455280_at   | Frem1         | AK051925  | -1.52 | 0.0013    | Fras1 related extracellular matrix protein 1                                           | 7160 // cell-matrix adhesion // inferred from mutant phenotype                                                               |
| 1442305_at   | Gtpbp2        | NM_019581 | -1.52 | 0.0152    | GTP binding protein 2                                                                  | protein biosynthesis: translational elongation                                                                               |
| 1433445_x_at | Hmgcs1        | NM_145942 | -1.52 | 0.00483   | 3-hydroxy-3-methylglutaryl-Coenzyme A synthase 1                                       | C21-steroid hormone biosynthesis: acetyl-CoA metabolism: cholesterol biosynthesis: regulation of transcription               |
| 1452899_at   | Rlan          | AB063319  | -1.52 | 0.0000361 | RNA imprinted and accumulated in nucleus                                               | biological_process unknown                                                                                                   |
| 1457898_at   | Kcng5         | AA617573  | -1.52 | 0.00838   | Potassium voltage-gated channel, subfamily Q, member 5                                 | 6812 // cation transport // inferred from electronic annotation                                                              |
| 1435292_at   | Tbc1d4        | BU517771  | -1.52 | 0.00293   | TBC1 domain family, member 4                                                           | 7275 // development // inferred from electronic annotation                                                                   |
| 1459617_at   | Mapk14        | AI552949  | -1.52 | 0.00501   | Mitogen activated protein kinase 14                                                    | 77 // DNA damage checkpoint // inferred from mutant phenotype                                                                |
| 1435927_at   | E030003N15Rik | XM_128129 | -1.51 | 0.00219   | RIKEN cDNA E030003N15 gene                                                             |                                                                                                                              |
| 1452514_a_at | Kit           | NM_021099 | -1.51 | 0.00466   | Kit oncogene                                                                           | autophosphorylation: cell differentiation: cell proliferation: cellular physiological process: chemotaxis                    |
| 1430967_at   | 3110080O07Rik | AV169086  | -1.51 | 0.0246    | Mus musculus cDNA clone 3110080O07                                                     |                                                                                                                              |
| 1438783_at   | Tmepal        | AW742560  | -1.51 | 0.000104  | Transmembrane, prostate androgen induced RNA                                           |                                                                                                                              |
| 1438279_at   | Dpp4          | NM_010074 | -1.51 | 0.0197    | Dipeptidylpeptidase 4                                                                  | proteolysis and peptidolysis                                                                                                 |

|              |               |           |       |           |                                                                                        |                                                                                                                          |
|--------------|---------------|-----------|-------|-----------|----------------------------------------------------------------------------------------|--------------------------------------------------------------------------------------------------------------------------|
| 1438235_at   | Crlf3         | BE988213  | -1.51 | 0.0259    | Cytokine receptor-like factor 3                                                        |                                                                                                                          |
| 1445860_at   | 1110014F12Rik | NM_026743 | -1.50 | 0.0165    | RIKEN cDNA 1110014F12 gene                                                             |                                                                                                                          |
| 1458058_at   | Bcas3         | AK078571  | -1.50 | 0.0168    | Breast carcinoma amplified sequence 3                                                  |                                                                                                                          |
| 1437700_at   | Schp1         | NM_013928 | -1.50 | 0.0024    | Schwannomin interacting protein 1                                                      |                                                                                                                          |
| 1450684_at   | Etv1          | NM_007960 | -1.50 | 0.00485   | Ets variant gene 1                                                                     | axon guidance; mechanosensory behavior; muscle development; regulation of transcription, DNA-dependent                   |
| 1424613_at   | Gprc5b        | NM_022420 | 1.50  | 0.00316   | G protein-coupled receptor, family C, group 5, member B                                | G-protein coupled receptor protein signaling pathway                                                                     |
| 1435264_at   | Emilin2       | NM_145158 | 1.50  | 0.000956  | Elastin microfibril interfacier 2                                                      | cell adhesion                                                                                                            |
| 1439649_at   | 4933429I20Rik | NM_172875 | 1.50  | 0.0045    | RIKEN cDNA 4933429I20 gene                                                             | polyamine biosynthesis                                                                                                   |
| 1421074_at   | Cyp7b1        | NM_007825 | 1.50  | 0.034     | Cytochrome P450, family 7, subfamily b, polypeptide 1                                  | cholesterol metabolism; electron transport                                                                               |
| 1419045_at   | 2310067G05Rik | NM_025877 | 1.50  | 0.00162   | RIKEN cDNA 2310067G05 gene                                                             |                                                                                                                          |
| 1416111_at   | Cd83          | NM_009856 | 1.50  | 0.000188  | CD83 antigen                                                                           |                                                                                                                          |
| 1448265_x_at | Eva1          | NM_007962 | 1.50  | 0.00269   | Epithelial V-like antigen 1                                                            | cell adhesion                                                                                                            |
| 1454742_at   | Rasgef1b      | NM_145839 | 1.50  | 0.0000467 | RasGEF domain family, member 1B                                                        | cytokinesis                                                                                                              |
| 1455731_at   | Slc29a3       | NM_023596 | 1.50  | 0.000137  | Solute carrier family 29 (nucleoside transporters), member 3                           | transport                                                                                                                |
| 1421076_at   | Sertad3       | NM_133210 | 1.50  | 0.000189  | DNA Segment, Chr 1, Mouse Genome Informatics 51                                        |                                                                                                                          |
| 1451371_at   | 1110025G12Rik | NM_029844 | 1.50  | 0.0357    | RIKEN cDNA 1110025G12 gene                                                             |                                                                                                                          |
| 1417130_s_at | Angptl4       | NM_020581 | 1.50  | 0.00733   | Angiopoietin-like 4                                                                    | negative regulation of apoptosis                                                                                         |
| 1449056_at   | E330009J07Rik | NM_175528 | 1.50  | 0.00107   | RIKEN cDNA E330009J07 gene                                                             |                                                                                                                          |
| 1447101_at   | Rnf122        | BE447516  | 1.50  | 0.00553   | Ring finger protein 122                                                                |                                                                                                                          |
| 1453599_at   | 2610206G21Rik | AK011901  | 1.51  | 0.0217    | RIKEN full-length enriched library, clone:2610206G21 G254                              |                                                                                                                          |
| 1426022_a_at | Vill          | NM_011700 | 1.51  | 0.0207    | Villin-like                                                                            | cytoskeleton organization and biogenesis                                                                                 |
| 1425245_a_at | Rgs11         | BC049910  | 1.52  | 0.00103   | Regulator of G-protein signaling 11                                                    | G-protein coupled receptor protein signaling pathway; intracellular signaling cascade; signal transduction               |
| 1437811_x_at | Cot11         | AV312368  | 1.52  | 0.01      | Coactosin-like 1 (Dictyostellium)                                                      |                                                                                                                          |
| 1427082_at   | 4632417N05Rik | NM_028725 | 1.52  | 0.00645   | RIKEN cDNA 4632417N05 gene                                                             |                                                                                                                          |
| 1416368_at   | Gsta4         | NM_010357 | 1.52  | 0.0289    | Glutathione S-transferase, alpha 4                                                     |                                                                                                                          |
| 1418799_a_at | Col17a1       | NM_007732 | 1.52  | 0.00102   | Procollagen, type XVII, alpha 1                                                        | cell adhesion; phosphate transport                                                                                       |
| 1426471_at   | Zfp52         | NM_144515 | 1.52  | 0.00501   | Zinc finger protein 52                                                                 | regulation of transcription, DNA-dependent                                                                               |
| 1439266_a_at | Polr3k        | NM_025901 | 1.52  | 0.0105    | Polymerase (RNA) III (DNA directed) polypeptide K                                      | RNA elongation; regulation of transcription, DNA-dependent                                                               |
| 1416933_at   | Por           | NM_008898 | 1.53  | 0.000135  | P450 (cytochrome) oxidoreductase                                                       | electron transport                                                                                                       |
| 1417266_at   | Ccl6          | NM_009139 | 1.53  | 0.00165   | Chemokine (C-C motif) ligand 6                                                         | chemotaxis; immune response; signal transduction                                                                         |
| 1422808_s_at | Dock2         | NM_033374 | 1.53  | 0.00494   | Dedicator of cyto-kinesis 2                                                            | T-cell activation; T-cell proliferation; alpha-beta T-cell activation; alpha-beta T-cell proliferation; chemotaxis       |
| 1420715_a_at | Pparg         | NM_011146 | 1.53  | 0.0109    | Peroxisome proliferator activated receptor gamma                                       | adipocyte differentiation; inflammatory response; negative regulation of transcription from Pol II promoter              |
| 1430148_at   | Rab19         | NM_011226 | 1.53  | 0.000121  | RAB19, member RAS oncogene family                                                      | protein transport; small GTPase mediated signal transduction                                                             |
| 1420905_at   | Il17r         | NM_008359 | 1.53  | 0.0000647 | Interleukin 17 receptor                                                                | cell surface receptor linked signal transduction                                                                         |
| 1423613_at   | Ssfa2         | NM_080558 | 1.53  | 0.0000877 | Sperm specific antigen 2                                                               |                                                                                                                          |
| 1424404_at   | 0610040J01Rik | NM_029554 | 1.54  | 0.000354  | RIKEN cDNA 0610040J01 gene                                                             |                                                                                                                          |
| 1454906_at   | Rarb          | NM_011243 | 1.54  | 0.00356   | Retinoic acid receptor, beta                                                           | regulation of transcription, DNA-dependent; ureteric bud development                                                     |
| 1453102_at   | Firt3         | NM_178382 | 1.54  | 0.00416   | Fibronectin leucine rich transmembrane protein 3                                       | chemotaxis                                                                                                               |
| 1448553_at   | Myh7          | NM_080728 | 1.54  | 0.00787   | Myosin, heavy polypeptide 7, cardiac muscle, beta                                      | cytoskeleton organization and biogenesis; muscle development; protein amino acid alkylation; striated muscle contraction |
| 1448415_a_at | Sema3b        | NM_009153 | 1.54  | 0.00454   | Sema domain, immunoglobulin domain (Ig), short basic domain, secreted, (semaphorin) 3B | development; neurogenesis                                                                                                |
| 1424824_at   | 9630044O09Rik | NM_198014 | 1.54  | 0.0123    | RIKEN cDNA 9630044O09 gene                                                             |                                                                                                                          |
| 1422542_at   | Gpr34         | NM_011823 | 1.54  | 0.00736   | G protein-coupled receptor 34                                                          | G-protein coupled receptor protein signaling pathway                                                                     |
| 1445815_at   | Fzd8          | NM_008058 | 1.55  | 0.00283   | Frizzled homolog 8 (Drosophila)                                                        | G-protein coupled receptor protein signaling pathway; Wnt receptor signaling pathway; development                        |
| 1439768_x_at | Sema4f        | NM_011350 | 1.55  | 0.0278    | Sema domain, immunoglobulin domain (Ig), TM domain, and short cytoplasmic domain       | development; neurogenesis                                                                                                |
| 1455610_at   | Dmn           | NM_183312 | 1.55  | 0.00261   | Desmuslin                                                                              | biological_process unknown                                                                                               |
| 1417047_at   | Prom2         | NM_138750 | 1.55  | 0.00851   | Prominin 2                                                                             | electron transport                                                                                                       |
| 1448591_at   | Clss          | NM_021281 | 1.55  | 0.00147   | Cathepsin S                                                                            | proteolysis and peptidolysis                                                                                             |
| 1460188_at   | Hcph          | NM_013545 | 1.56  | 0.0015    | Hemopoietic cell phosphatase                                                           | cytokine, chemokine mediated signaling pathway; intracellular signaling cascade; protein amino acid dephosphorylation    |
| 1436905_x_at | Lap1m5        | NM_010686 | 1.56  | 0.0000187 | Lysosomal-associated protein transmembrane 5                                           |                                                                                                                          |
| 1448956_at   | Stard10       | NM_019990 | 1.56  | 0.0000884 | START domain containing 10                                                             |                                                                                                                          |
| 1433963_a_at | BC032204      | NM_153795 | 1.56  | 0.00489   | CDNA sequence BC032204                                                                 | cell adhesion; tRNA splicing                                                                                             |
| 1455451_at   | Al449310      | BCG242920 | 1.56  | 0.00266   | Expressed sequence AI449310                                                            |                                                                                                                          |
| 1434980_at   | Pik3r5        | BF720745  | 1.56  | 0.0206    | Phosphoinositide-3-kinase, regulatory subunit 5, p101                                  |                                                                                                                          |
| 1434913_at   | Hmgcl1        | NM_173731 | 1.56  | 0.00265   | 3-hydroxymethyl-3-methylglutaryl-Coenzyme A lyase-like 1                               |                                                                                                                          |
| 1444396_at   | Trp53inp2     | NM_178111 | 1.56  | 0.0227    | Tumor protein p53 inducible nuclear protein 2                                          |                                                                                                                          |
| 1449351_s_at | Pdgfr         | NM_019971 | 1.56  | 0.00638   | Platelet-derived growth factor, C polypeptide                                          | organogenesis; platelet-derived growth factor receptor signaling pathway; positive regulation of cell proliferation      |
| 1437835_a_at | 0610011L14Rik | NM_026661 | 1.56  | 0.014     | RIKEN cDNA 0610011L14 gene                                                             |                                                                                                                          |
| 1455735_at   | Ap1s3         | NM_183027 | 1.57  | 0.0195    | Adaptor-related protein complex AP-1, sigma 3                                          | biological_process unknown                                                                                               |
| 1448871_at   | Mapk13        | NM_011950 | 1.57  | 0.00247   | Mitogen activated protein kinase 13                                                    | cell cycle; protein amino acid phosphorylation                                                                           |
| 1421326_at   | Csf2rb2       | NM_007781 | 1.57  | 0.0128    | Colony stimulating factor 2 receptor, beta 2, low-affinity (granulocyte-macrophage)    |                                                                                                                          |
| 1417422_at   | Gnmt          | NM_010321 | 1.57  | 0.000204  | Glycine N-methyltransferase                                                            |                                                                                                                          |
| 1420712_a_at | Hpn           | NM_008281 | 1.57  | 0.00056   | Hepsin                                                                                 | proteolysis and peptidolysis                                                                                             |
| 1423024_at   | Eat2          | NM_012009 | 1.57  | 0.00496   | EWS/FLI1 activated transcript 2                                                        | intracellular signaling cascade                                                                                          |
| 1448617_at   | Cd53          | NM_007651 | 1.57  | 0.0167    | CD53 antigen                                                                           |                                                                                                                          |

|             |               |           |      |           |                                                                                     |                                                                                                                          |
|-------------|---------------|-----------|------|-----------|-------------------------------------------------------------------------------------|--------------------------------------------------------------------------------------------------------------------------|
| 1434089_at  | Synpo         | XM_129030 | 1.57 | 0.000867  | synaptopodin                                                                        |                                                                                                                          |
| 1416124_at  | Ccnd2         | NM_009829 | 1.57 | 0.00427   | Cyclin D2                                                                           | cell cycle; cytokinesis; regulation of cell cycle                                                                        |
| 1422836_at  | Mbnl3         | NM_134163 | 1.57 | 0.00337   | Muscleblind-like 3 (Drosophila)                                                     | development; negative regulation of myoblast differentiation                                                             |
| 1434118_at  | O610009K11Rik | NM_026689 | 1.57 | 0.0103    | RIKEN cDNA O610009K11 gene                                                          |                                                                                                                          |
| 1421952_at  | Capn6         | NM_007603 | 1.57 | 0.00137   | Calpain 6                                                                           | proteolysis and peptidolysis                                                                                             |
| 1434864_at  | Nipa1         | NM_153578 | 1.57 | 0.00671   | Non imprinted in Prader-Willi/Angelman syndrome 1 homolog (human)                   |                                                                                                                          |
| 1448227_at  | Grb7          | NM_010346 | 1.57 | 0.00359   | Growth factor receptor bound protein 7                                              | intracellular signaling cascade; signal transduction                                                                     |
| 1451407_at  | Jam4          | NM_028078 | 1.58 | 0.000708  | Junction adhesion molecule 4                                                        | cell-cell adhesion                                                                                                       |
| 1440147_at  | Lgi2          | NM_144945 | 1.58 | 0.00081   | Leucine-rich repeat LGI family, member 2                                            |                                                                                                                          |
| 1418118_at  | Slc22a1       | NM_009202 | 1.58 | 0.0303    | Solute carrier family 22 (organic cation transporter), member 1                     | cation transport                                                                                                         |
| 1434109_at  | Sh3bgrl2      | NM_172507 | 1.58 | 0.0225    | SH3 domain binding glutamic acid-rich protein like 2                                |                                                                                                                          |
| 1418219_at  | Il15          | NM_008357 | 1.58 | 0.000636  | Interleukin 15                                                                      | NK T-cell proliferation; extrathymic T-cell selection; immune response; lymph gland development                          |
| 1433504_at  | Pygb          | NM_153781 | 1.58 | 0.000202  | Brain glycogen phosphorylase                                                        | carbohydrate metabolism; glycogen metabolism                                                                             |
| 1424927_at  | Gilpr1        | NM_028608 | 1.58 | 0.0212    | GLI pathogenesis-related 1 (glioma)                                                 |                                                                                                                          |
| 1419132_at  | Tlr2          | NM_011905 | 1.59 | 0.00104   | Toll-like receptor 2                                                                | cell surface receptor linked signal transduction; immune response; inflammatory response                                 |
| 1443928_at  | A1462064      | BF453416  | 1.59 | 0.00177   | Mus musculus cDNA clone IMAGE:3821985 5', mRNA sequence.                            |                                                                                                                          |
| 1455660_at  | Csf2rb1       | NM_007780 | 1.59 | 0.000467  | Colony stimulating factor 2 receptor, beta 1, low-affinity (granulocyte-macrophage) |                                                                                                                          |
| 1416986_a_a | Ptpns1        | NM_007547 | 1.59 | 0.00756   | RIKEN cDNA 2900076A13 gene                                                          | actin filament organization; cell motility; cell-matrix adhesion; cytoskeleton organization and biogenesis; phagocytosis |
| 1418842_at  | Hcls1         | NM_008225 | 1.59 | 0.0224    | Hematopoietic cell specific Lyn substrate 1                                         |                                                                                                                          |
| 1433678_at  | A1132321      | NM_178911 | 1.59 | 0.000386  | Expressed sequence A1132321                                                         | lipid catabolism                                                                                                         |
| 1441516_a_a | C130050O18Rik | NM_177000 | 1.59 | 0.0033    | RIKEN cDNA C130050O18 gene                                                          |                                                                                                                          |
| 1416554_at  | Pdlim1        | NM_016861 | 1.60 | 0.000109  | PDZ and LIM domain 1 (elfin)                                                        | regulation of transcription                                                                                              |
| 1417789_at  | Ccl11         | NM_011330 | 1.60 | 0.0158    | Small chemokine (C-C motif) ligand 11                                               | chemotaxis; immune response; inflammatory response; signal transduction                                                  |
| 1448561_at  | Ncf2          | NM_010877 | 1.60 | 0.00908   | Neutrophil cytosolic factor 2                                                       | NADP catabolism; superoxide metabolism                                                                                   |
| 1427076_at  | Mpeg1         | L20315    | 1.60 | 0.00428   | Macrophage expressed gene 1                                                         |                                                                                                                          |
| 1459299_at  | A430065P19Rik | NM_177376 | 1.60 | 0.0184    | RIKEN cDNA A430065P19 gene                                                          |                                                                                                                          |
| 1450387_s_a | Ak4           | NM_009647 | 1.61 | 0.00301   | Adenylate kinase 4                                                                  |                                                                                                                          |
| 1450241_a_a | Evi2a         | NM_010161 | 1.61 | 0.0229    | Ecotropic viral integration site 2a                                                 | cell growth and/or maintenance                                                                                           |
| 1439048_at  | 2900078E11Rik | AK046773  | 1.62 | 0.00257   | RIKEN cDNA 2900078E11 gene                                                          |                                                                                                                          |
| 1436989_s_a | Slc12a6       | NM_133648 | 1.62 | 0.0063    | RIKEN cDNA E330013P08 gene                                                          | amino acid transport; chloride transport; ion transport; potassium ion transport; sodium ion transport                   |
| 1435917_at  | Ociad2        | BC044883  | 1.62 | 0.0013    | OClA domain containing 2                                                            |                                                                                                                          |
| 1427327_at  | Pllra         | NM_153510 | 1.62 | 0.00365   | Paired immunoglobulin-like type 2 receptor alpha                                    | signal transduction                                                                                                      |
| 1419534_at  | Olr1          | NM_138648 | 1.62 | 0.0188    | Oxidized low density lipoprotein (lectin-like) receptor 1                           |                                                                                                                          |
| 1422178_a_a | Rab17         | NM_008998 | 1.62 | 0.0164    | RAB17, member RAS oncogene family                                                   | protein transport; small GTPase mediated signal transduction                                                             |
| 1420980_at  | Pak1          | NM_011035 | 1.62 | 0.000304  | P21 (CDKN1A)-activated kinase 1                                                     | dendrite morphogenesis; protein amino acid phosphorylation                                                               |
| 1418809_at  | Pira6         | NM_011087 | 1.62 | 0.0273    | Paired-Ig-like receptor A1                                                          | biological_process unknown                                                                                               |
| 1433966_x_a | Asns          | NM_012055 | 1.62 | 0.0146    | Asparagine synthetase                                                               | amino acid biosynthesis; asparagine biosynthesis; glutamine metabolism                                                   |
| 1427126_at  | Hspa1a        | XM_207062 | 1.63 | 0.00511   | heat shock protein, 70 kDa                                                          | DNA repair; response to heat; telomere maintenance                                                                       |
| 1420699_at  | Clec3f12      | NM_020008 | 1.63 | 0.0023    | C-type lectin domain family 7, member a                                             | cell surface receptor linked signal transduction; cell-cell adhesion; detection of yeast; phagocytosis, engulfment       |
| 1430834_at  | C030038J10Rik | BB359379  | 1.63 | 0.00526   | Mus musculus cDNA clone C030038J10 3', mRNA sequence.                               |                                                                                                                          |
| 1450058_at  | Asph          | NM_023066 | 1.63 | 0.00176   | Aspartate-beta-hydroxylase                                                          |                                                                                                                          |
| 1421969_a_a | Faah          | NM_010173 | 1.63 | 0.00204   | Fatty acid amide hydrolase                                                          |                                                                                                                          |
| 1449429_at  | Fkbp1b        | NM_016863 | 1.64 | 0.00161   | FK506 binding protein 1b                                                            | protein folding                                                                                                          |
| 1425619_s_a | Dsg2          | NM_007883 | 1.64 | 0.000244  | Desmoglein 2                                                                        | cell adhesion; homophilic cell adhesion                                                                                  |
| 1449058_at  | Gli1          | NM_010296 | 1.64 | 0.00177   | GLI-Kruppel family member GLI1                                                      | regulation of transcription, DNA-dependent; signal transduction; spermatogenesis                                         |
| 1428031_at  | Gpr24         | NM_145132 | 1.65 | 0.00185   | G protein coupled receptor 24                                                       | G-protein coupled receptor protein signaling pathway; neuropeptide signaling pathway                                     |
| 1443664_s_a | Z310047N01Rik | CB587604  | 1.65 | 0.00215   | RIKEN cDNA Z310047N01 gene                                                          |                                                                                                                          |
| 1416246_a_a | Coro1a        | NM_009898 | 1.65 | 0.0028    | Coronin, actin binding protein 1A                                                   |                                                                                                                          |
| 1435323_a_a | Oact1         | NM_153546 | 1.65 | 0.00439   | O-acyltransferase (membrane bound) domain containing 1                              |                                                                                                                          |
| 1425109_at  | BC010552      | NM_145394 | 1.65 | 0.000154  | CDNA sequence BC010552                                                              |                                                                                                                          |
| 1417689_a_a | Map17         | NM_026018 | 1.65 | 0.00477   | Membrane-associated protein 17                                                      | biological_process unknown                                                                                               |
| 1425767_a_a | Six4          | NM_011382 | 1.65 | 0.00229   | Sine oculis-related homeobox 4 homolog (Drosophila)                                 | development; regulation of transcription, DNA-dependent                                                                  |
| 1449544_a_a | Kcnh2         | NM_013569 | 1.65 | 0.0000572 | Potassium voltage-gated channel, subfamily H (eag-related), member 2                | cation transport; circulation; muscle contraction; potassium ion transport; regulation of heart contraction rate         |
| 1434372_at  | AW112010      | AA726875  | 1.66 | 0.0206    | Expressed sequence AW112010                                                         |                                                                                                                          |
| 1453754_at  | 4930429A08Rik | AK043160  | 1.66 | 0.00605   | RIKEN cDNA 4930429A08 gene                                                          |                                                                                                                          |
| 1455531_at  | A930031D07Rik | NM_172510 | 1.66 | 0.0333    | RIKEN cDNA A930031D07 gene                                                          |                                                                                                                          |
| 1437078_at  | Vps52         | AK051732  | 1.66 | 0.00816   | Vacuolar protein sorting 52 (yeast)                                                 |                                                                                                                          |
| 1420819_at  | Sla           | NM_009192 | 1.66 | 0.00155   | Src-like adaptor                                                                    | intracellular signaling cascade                                                                                          |
| 1423147_at  | Mat1a         | NM_133653 | 1.67 | 0.00929   | Methionine adenosyltransferase 1, alpha                                             | one-carbon compound metabolism                                                                                           |
| 1419631_at  | Was           | NM_009515 | 1.67 | 0.00549   | Wiskott-Aldrich syndrome homolog (human)                                            | T-cell activation; actin filament polymerization; actin filament-based movement; actin polymerization                    |
| 1428111_at  | Slc38a4       | NM_027052 | 1.67 | 0.00131   | Solute carrier family 38, member 4                                                  | amino acid transport                                                                                                     |
| 1420464_s_a | Pirb          | NM_011095 | 1.67 | 0.0126    | Paired-Ig-like receptor B                                                           | B-cell homeostasis; B-cell mediated immunity; cytokine and chemokine mediated signaling pathway; dendritic cell growth   |
| 1429274_at  | Z310010M24Rik | NM_027990 | 1.67 | 0.000504  | RIKEN cDNA Z310010M24 gene                                                          |                                                                                                                          |
| 1448898_at  | Ccl9          | NM_011338 | 1.68 | 0.0031    | Chemokine (C-C motif) ligand 9                                                      | chemotaxis; immune response; signal transduction                                                                         |

|              |               |           |      |           |                                                                                  |                                                                                                                   |
|--------------|---------------|-----------|------|-----------|----------------------------------------------------------------------------------|-------------------------------------------------------------------------------------------------------------------|
| 1418283_at   | Cldn4         | NM_009903 | 1.68 | 0.00946   | Claudin 4                                                                        |                                                                                                                   |
| 1453509_at   | Lypdc2        | A1529499  | 1.68 | 0.00212   | Ly6/Plaur domain containing 2                                                    |                                                                                                                   |
| 1425407_s_at | Clec3f6       | NM_011999 | 1.68 | 0.0107    | C-type lectin domain family 4, member a2                                         |                                                                                                                   |
| 1457349_at   | na            | XM_126988 | 1.68 | 0.00198   | Gene model 69, (NCBI)                                                            |                                                                                                                   |
| 1437150_at   | 1700012H17Rik | NM_173426 | 1.69 | 0.0000334 | RIKEN cDNA 1700012H17 gene                                                       |                                                                                                                   |
| 1451764_at   | Marveld3      | NM_028584 | 1.69 | 0.00105   | MARVEL (membrane-associating) domain containing 3                                |                                                                                                                   |
| 1460197_a_a  | Tnfalp9       | NM_054098 | 1.69 | 0.00488   | Tumor necrosis factor, alpha-induced protein 9                                   | 6810 // transport // inferred from electronic annotation /// 6118 // F420_oxidored;electron transport             |
| 1427942_at   | Pamci         | NM_146240 | 1.69 | 0.00266   | Peptidylglycine alpha-amidating monooxygenase COOH-terminal interactor           | neuropeptide signaling pathway                                                                                    |
| 1452966_at   | 9130430L19Rik | AK020296  | 1.70 | 0.00435   | RIKEN cDNA 9130430L19 gene                                                       |                                                                                                                   |
| 1427892_at   | Myo1g         | NM_178440 | 1.70 | 0.0124    | Myosin IG                                                                        |                                                                                                                   |
| 1449164_at   | Cd68          | NM_009853 | 1.70 | 0.00339   | CD68 antigen                                                                     |                                                                                                                   |
| 1427008_at   | 4732452J19Rik | NM_172448 | 1.70 | 0.000124  | RIKEN cDNA 4732452J19 gene                                                       |                                                                                                                   |
| 1457753_at   | Tlr13; Gm713  | NM_205820 | 1.70 | 0.00612   | Mus musculus toll-like receptor 13 (Tlr13), mRNA.                                |                                                                                                                   |
| 1418321_at   | Dci           | NM_010023 | 1.71 | 0.00042   | Dodecenoyl-Coenzyme A delta isomerase (3,2 trans-enoyl-Coenzyme A isomerase)     | fatty acid beta-oxidation; fatty acid metabolism                                                                  |
| 1419627_s_at | Clec3f10      | NM_020001 | 1.72 | 0.0042    | C-type lectin domain family 4, member n                                          | heterophilic cell adhesion                                                                                        |
| 1436345_at   | 5730559C18Rik | BC052416  | 1.72 | 0.0303    | RIKEN cDNA 5730559C18 gene                                                       |                                                                                                                   |
| 1450792_at   | Tyrobp        | NM_011662 | 1.72 | 0.00105   | TYRO protein tyrosine kinase binding protein                                     |                                                                                                                   |
| 1429831_at   | Plk3ap1       | NM_031376 | 1.72 | 0.00215   | Phosphoinositide-3-kinase adaptor protein 1                                      |                                                                                                                   |
| 1438325_at   | Evi1          | NM_007963 | 1.72 | 0.000331  | Ecotropic viral integration site 1                                               | development; regulation of transcription, DNA-dependent                                                           |
| 1450240_a_a  | Sytl1         | NM_031393 | 1.73 | 0.0013    | Synaptotagmin-like 1                                                             | hydrogen transport; intracellular protein transport                                                               |
| 1425452_s_at | AW125753      | NM_029007 | 1.73 | 0.000334  | Expressed sequence AW125753                                                      | 7507 // heart development // inferred from mutant phenotype                                                       |
| 1430700_a_a  | Pla2g7        | NM_013737 | 1.74 | 0.0241    | Phospholipase A2, group VII (platelet-activating factor acetylhydrolase, plasma) | inflammatory response; lipid catabolism                                                                           |
| 1437085_at   | D630039A03Rik | NM_178727 | 1.74 | 0.000133  | RIKEN cDNA D630039A03 gene                                                       |                                                                                                                   |
| 1421187_at   | Ccr2          | NM_009915 | 1.74 | 0.0043    | Chemokine (C-C motif) receptor 2                                                 |                                                                                                                   |
| 1439634_at   | 4930505D03Rik | BC059081  | 1.74 | 0.000468  | RIKEN cDNA 4930505D03 gene                                                       | G-protein coupled receptor protein signaling pathway; cellular defense response (sensu Vertebrata); chemotaxis    |
| 1422552_at   | Reprimo       | NM_023396 | 1.74 | 0.0000162 | Reprimo, TP53 dependant G2 arrest mediator candidate                             | cell cycle arrest; regulation of mitotic cell cycle                                                               |
| 1423891_at   | Gstl3         | NM_133994 | 1.74 | 0.000716  | Glutathione S-transferase, theta 3                                               | glutathione metabolism                                                                                            |
| 1450678_at   | Itgb2         | NM_008404 | 1.75 | 0.00177   | Integrin beta 2                                                                  | cell adhesion; cell-matrix adhesion; cellular extravasation; development; integrin-mediated signaling pathway     |
| 1452473_at   | E130201N16Rik | NM_030024 | 1.75 | 0.00317   | RIKEN cDNA E130201N16 gene                                                       |                                                                                                                   |
| 1438884_at   | D830007B15Rik | AK077061  | 1.75 | 0.000137  | RIKEN cDNA D830007B15 gene                                                       |                                                                                                                   |
| 1438097_at   | Rab20         | NM_011227 | 1.75 | 0.0000849 | RAB20, member RAS oncogene family                                                | protein transport; small GTPase mediated signal transduction                                                      |
| 1422953_at   | Fpr1          | NM_008039 | 1.76 | 0.0147    | Formyl peptide receptor, related sequence 2                                      | 6935 // chemotaxis // traceable author statement /// 7186 // G-protein coupled receptor protein signaling pathway |
| 1424737_at   | Thrsp         | NM_009381 | 1.76 | 0.0216    | Thyroid hormone responsive SPOT14 homolog (Rattus)                               |                                                                                                                   |
| 1444262_at   | 2210020M01Rik | BY704006  | 1.77 | 0.00617   | RIKEN cDNA 2210020M01 gene                                                       |                                                                                                                   |
| 1419537_at   | Tcfec         | NM_031198 | 1.77 | 0.00508   | Transcription factor EC                                                          | development; regulation of transcription, DNA-dependent                                                           |
| 1434354_at   | Maob          | NM_172778 | 1.78 | 0.000121  | Monoamine oxidase B                                                              | electron transport                                                                                                |
| 1418601_at   | Aldh1a7       | NM_011921 | 1.78 | 0.000405  | Aldehyde dehydrogenase family 1, subfamily A7                                    | metabolism; retinal metabolism                                                                                    |
| 1419599_s_at | Ms4a6d        | NM_026835 | 1.78 | 0.00107   | Membrane-spanning 4-domains, subfamily A, member 11                              |                                                                                                                   |
| 1455923_at   | Kctd8         | NM_175519 | 1.79 | 0.000487  | Potassium channel tetramerisation domain containing 8                            |                                                                                                                   |
| 1430247_at   | Daam2         | AK122266  | 1.79 | 0.00266   | Dishevelled associated activator of morphogenesis 2                              |                                                                                                                   |
| 1460218_at   | Cd52          | NM_013706 | 1.80 | 0.00126   | CD52 antigen                                                                     |                                                                                                                   |
| 1417268_at   | Cd14          | NM_009841 | 1.80 | 0.00246   | CD14 antigen                                                                     | immune response; inflammatory response                                                                            |
| 1438555_x_at | Muc4          | NM_080457 | 1.80 | 0.0155    | RIKEN cDNA 4933405I11 gene                                                       | cell-matrix adhesion                                                                                              |
| 1418496_at   | Foxa1         | NM_008259 | 1.80 | 0.0000722 | Forkhead box A1                                                                  | regulation of transcription, DNA-dependent                                                                        |
| 1420697_at   | Slc15a3       | NM_023044 | 1.81 | 0.0259    | Solute carrier family 15, member 3                                               | oligopeptide transport                                                                                            |
| 1417845_at   | Cldn6         | NM_018777 | 1.81 | 0.00537   | Claudin 6                                                                        |                                                                                                                   |
| 1453041_at   | Tp53f5        | NM_178381 | 1.81 | 0.0036    | Tumor protein p53 inducible protein 5                                            |                                                                                                                   |
| 1430612_at   | 1810033B17Rik | AK087121  | 1.82 | 0.00616   | RIKEN cDNA 1810033B17 gene                                                       |                                                                                                                   |
| 1436712_at   | Pla2g4c       | XM_149881 | 1.82 | 0.00162   | egg and early embryo abundant protein; CPLA2-gamma;                              | biological_process unknown                                                                                        |
| 1427301_at   | Cd48          | NM_007649 | 1.83 | 0.014     | CD48 antigen                                                                     |                                                                                                                   |
| 1444589_at   |               | NM_177596 | 1.83 | 0.00256   | Hypothetical protein 6720451E15                                                  |                                                                                                                   |
| 1419608_a_a  | Mia1          | NM_019394 | 1.84 | 0.000695  | Melanoma inhibitory activity 1                                                   | cell-matrix adhesion; extracellular matrix organization and biogenesis                                            |
| 1435697_s_at | Pscdbp        | NM_139200 | 1.84 | 0.00208   | Pleckstrin homology, Sec7 and coiled-coil domains, binding protein               | regulation of cell adhesion                                                                                       |
| 1434877_at   | Nptx1         | NM_008730 | 1.85 | 0.00268   | Neuronal pentraxin 1                                                             |                                                                                                                   |
| 1422411_s_at | Ear1          | NM_007895 | 1.85 | 0.0107    | Eosinophil-associated, ribonuclease A family, member 1                           | chemotaxis                                                                                                        |
| 1434049_at   | Entpd3        | NM_178676 | 1.85 | 0.000501  | Ectonucleoside triphosphate diphosphohydrolase 3                                 | nucleoside diphosphate catabolism; nucleoside triphosphate catabolism                                             |
| 1429954_at   | 3110037K17Rik | NM_153197 | 1.86 | 0.0103    | C-type lectin domain family 4, member a3                                         |                                                                                                                   |
| 1438493_at   | 4933433K01Rik | XM_110919 | 1.86 | 0.0000559 | RIKEN cDNA 4933433K01 gene                                                       |                                                                                                                   |
| 1454942_at   | Niban         | NM_022018 | 1.87 | 0.000435  | Niban protein                                                                    | biological_process unknown                                                                                        |
| 1436178_at   | Leprel1       | NM_173379 | 1.87 | 0.000783  | Leprecan-like 1                                                                  |                                                                                                                   |
| 1426657_s_at | Phgdh         | NM_016966 | 1.88 | 0.00173   | 3-phosphoglycerate dehydrogenase                                                 | L-serine biosynthesis                                                                                             |
| 1417618_at   | Ilth2         | NM_010582 | 1.88 | 0.0328    | Inter-alpha trypsin inhibitor, heavy chain 2                                     | hyaluronan metabolism                                                                                             |
| 1418668_at   | Bucs1         | NM_054094 | 1.88 | 0.000719  | Butyryl Coenzyme A synthetase 1                                                  | fatty acid biosynthesis; metabolism                                                                               |
| 1417957_a_a  | 9030418M05Rik | NM_133681 | 1.89 | 0.00385   | Tetraspan 1                                                                      |                                                                                                                   |



|             |               |           |       |            |                                                                                   |                                                                                                                        |
|-------------|---------------|-----------|-------|------------|-----------------------------------------------------------------------------------|------------------------------------------------------------------------------------------------------------------------|
| 1429524_at  | Myo1f         | NM_008660 | 1.89  | 0.00326    | synonym: C33006B10Rik; go_component: myosin [goid 0016459]                        | 7010 // cytoskeleton organization and biogenesis // inferred from electronic annotation                                |
| 1448978_at  | Ngef          | NM_019867 | 1.89  | 0.000187   | Neuronal guanine nucleotide exchange factor                                       | cellular physiological process                                                                                         |
| 1422772_at  | C1galt1       | NM_052993 | 1.90  | 0.000484   | Core 1 UDP-galactose:N-acetylgalactosamine-alpha-R beta 1,3-galactosyltransferase | O-glycan processing, core 1                                                                                            |
| 1431362_a_a | Smoc2         | NM_022315 | 1.91  | 0.000457   | SPARC related modular calcium binding 2                                           | biological_process unknown                                                                                             |
| 1430128_a_a | Dp111         | NM_139292 | 1.91  | 0.0000222  | Deleted in polyposis 1-like 1                                                     |                                                                                                                        |
| 1450781_at  | Hmg2          | NM_010441 | 1.92  | 0.00199    | High mobility group AT-hook 2                                                     | DNA packaging; chromosome organization and biogenesis (sensu Eukaryota); regulation of transcription, DNA-dependent    |
| 1419321_at  | F7            | NM_010172 | 1.94  | 0.000953   | Coagulation factor VII                                                            | blood coagulation; metabolism; proteolysis and peptidolysis                                                            |
| 1450220_a_a | Spdef         | NM_013891 | 1.94  | 0.00479    | SAM pointed domain containing ets transcription factor                            | regulation of transcription, DNA-dependent                                                                             |
| 1448609_at  | Tst           | NM_009437 | 1.95  | 0.00342    | Thiosulfate sulfurtransferase, mitochondrial                                      | sulfate transport                                                                                                      |
| 1441975_at  | Acpp          | NM_019807 | 1.97  | 0.0209     | Acid phosphatase, prostate                                                        | biological_process unknown                                                                                             |
| 1424208_at  | Ptger4        | NM_008965 | 1.97  | 0.00396    | Prostaglandin E receptor 4 (subtype EP4)                                          | G-protein coupled receptor protein signaling pathway; G-protein signaling, adenylate cyclase activating pathway        |
| 1456621_at  | D430015B01Rik | NM_153574 | 1.98  | 0.000118   | RIKEN cDNA D430015B01 gene                                                        |                                                                                                                        |
| 1424155_at  | Fabp4         | NM_024406 | 1.99  | 0.00079    | Fatty acid binding protein 4, adipocyte                                           | transport                                                                                                              |
| 1419394_s_a | S100a8        | NM_013650 | 2.00  | 0.00163    | S100 calcium binding protein A8 (calgranulin A)                                   | chemotaxis                                                                                                             |
| 1453510_s_a | 4930589M24Rik | XM_125625 | 2.00  | 0.000805   | RIKEN cDNA 4930589M24 gene                                                        |                                                                                                                        |
| 1449091_at  | Cldn8         | NM_018778 | 2.00  | 0.00488    | Claudin 8                                                                         |                                                                                                                        |
| 1452262_at  | Grpel2        | NM_021296 | 2.01  | 0.000118   | GrpE-like 2, mitochondrial                                                        | protein folding                                                                                                        |
| 1436778_at  | Cybb          | NM_007807 | 2.02  | 0.000163   | Cytochrome b-245, beta polypeptide                                                | electron transport                                                                                                     |
| 1418961_at  | 1110005F07Rik | NM_025383 | 2.04  | 0.000759   | RIKEN cDNA 1110005F07 gene                                                        |                                                                                                                        |
| 1417481_at  | Ramp1         | NM_016894 | 2.05  | 0.00343    | Receptor (calictonin) activity modifying protein 1                                | G-protein coupled receptor protein signaling pathway; intracellular protein transport; regulation of G-protein pathway |
| 14242101_at | A930017N06Rik | NM_175522 | 2.08  | 0.00722    | RIKEN cDNA A930017N06 gene                                                        |                                                                                                                        |
| 1436256_at  | Grpel2        | NM_021296 | 2.10  | 0.000367   | GrpE-like 2, mitochondrial                                                        | protein folding                                                                                                        |
| 1418393_a_a | Itga7         | NM_008398 | 2.11  | 0.000336   | Integrin alpha 7                                                                  | cell adhesion; cell-matrix adhesion; cellular morphogenesis; integrin-mediated signaling pathway                       |
| 1418186_at  | Gstt1         | NM_008185 | 2.15  | 0.0023     | Glutathione S-transferase, theta 1                                                | glutathione metabolism                                                                                                 |
| 1424477_at  | BC019731      | NM_144914 | 2.16  | 0.0000334  | CDNA sequence BC019731                                                            |                                                                                                                        |
| 1421195_at  | Cckar         | NM_009827 | 2.16  | 0.00000794 | Cholecystokinin A receptor                                                        | G-protein coupled receptor protein signaling pathway                                                                   |
| 1435227_at  | Bcl11b        | NM_021399 | 2.19  | 0.00068    | B-cell leukemia/lymphoma 11B                                                      | lymph gland development; negative regulation of cell proliferation; regulation of transcription, DNA-dependent         |
| 1458683_at  | Sirpb         | NM_178792 | 2.20  | 0.00569    | Signal-regulatory protein beta                                                    | intracellular signaling cascade; positive regulation of phagocytosis                                                   |
| 1439204_at  | Scn3a         | NM_018732 | 2.23  | 0.00181    | sodium channel, voltage-gated, type III, alpha polypeptide                        | cation transport                                                                                                       |
| 1419766_at  | Snf1k         | NM_010831 | 2.34  | 0.0153     | SNF1-like kinase                                                                  | protein amino acid phosphorylation                                                                                     |
| 1450928_at  | Idb4          | NM_031166 | 2.39  | 0.000764   | Inhibitor of DNA binding 4                                                        |                                                                                                                        |
| 1422634_a_a | Vsig2         | NM_020518 | 2.46  | 0.0000165  | V-set and immunoglobulin domain containing 2                                      | biological_process unknown                                                                                             |
| 1418374_at  | Fxyd3         | NM_008557 | 2.50  | 0.00000574 | FXFD domain-containing ion transport regulator 3                                  | ion transport                                                                                                          |
| 1437344_x_a | Krt11-13      | NM_010662 | 2.56  | 0.024      | Keratin complex 1, acidic, gene 13                                                | cytoskeleton organization and biogenesis                                                                               |
| 1418724_at  | Cfli          | NM_007686 | 2.56  | 0.00461    | Complement component factor i                                                     | complement activation; complement activation, classical pathway; proteolysis and peptidolysis                          |
| 1435984_at  | 1110033F14Rik | CA328457  | 2.57  | 0.00851    | RIKEN cDNA 1110033F14 gene                                                        |                                                                                                                        |
| 1454402_at  | 3110048L19Rik | AK032425  | 2.61  | 0.00000258 | RIKEN cDNA 3110048L19 gene                                                        |                                                                                                                        |
| 1438567_at  | Amaco         | NM_172840 | 2.61  | 0.000478   | VWA-like domains, matrilins and collagens                                         | biological_process unknown                                                                                             |
| 1448906_at  | Cdh16         | NM_007663 | 2.71  | 0.000221   | Cadherin 16                                                                       | cell adhesion; homophilic cell adhesion; tRNA aminoacylation for protein translation                                   |
| 1427492_at  | Pof1b         | NM_181579 | 2.74  | 0.00143    | Premature ovarian failure 1B                                                      |                                                                                                                        |
| 1450808_at  | Fpr1          | NM_013521 | 2.79  | 0.00607    | Formyl peptide receptor 1                                                         | G-protein coupled receptor protein signaling pathway; chemotaxis                                                       |
| 1438707_at  | Alp13a4       | NM_172613 | 2.80  | 0.000419   | ATPase type 13A4                                                                  |                                                                                                                        |
| 1437355_at  | Zcchc5        | NM_199468 | 2.86  | 0.000063   | Zinc finger, CCHC domain containing 5                                             |                                                                                                                        |
| 1421118_a_a | Gpr56         | NM_018882 | 2.95  | 0.000631   | G protein-coupled receptor 56                                                     | G-protein coupled receptor protein signaling pathway; metabolism; neuropeptide signaling pathway                       |
| 1416456_a_a | 2200003E03Rik | NM_023186 | 3.02  | 0.00297    | RIKEN cDNA 2200003E03 gene                                                        | carbohydrate metabolism; chitin catabolism; chitin metabolism; polysaccharide catabolism                               |
| 1455893_at  | 2610028F08Rik | NM_172815 | 3.38  | 0.00203    | RIKEN cDNA 2610028F08 gene                                                        | protein amino acid phosphorylation; transmembrane receptor protein tyrosine kinase signaling pathway                   |
| 1429950_at  | Unc5cl        | NM_152823 | 3.39  | 0.0000415  | Unc-5 homolog C (C. elegans)-like                                                 | signal transduction                                                                                                    |
| 1449494_at  | Rab3c         | NM_023852 | 3.40  | 0.00298    | RAB3C, member RAS oncogene family                                                 | intracellular protein transport; regulation of exocytosis; small GTPase mediated signal transduction                   |
| 1416626_at  | Pla2g1b       | NM_011107 | 3.48  | 0.00012    | Phospholipase A2, group IB, pancreas                                              | cell proliferation; lipid catabolism; phospholipid catabolism; response to stress                                      |
| 1419118_at  | 2900093B09Rik | NM_021387 | 3.68  | 0.000423   | RIKEN cDNA 2900093B09 gene                                                        |                                                                                                                        |
| 1419325_at  | Nmu           | NM_019515 | 4.13  | 0.00365    | Neuromedin U                                                                      | neuropeptide signaling pathway; regulation of smooth muscle contraction                                                |
| 1419063_at  | Ugt8          | NM_011674 | 5.22  | 0.0000043  | UDP-glucuronosyltransferase 8                                                     | glycolipid biosynthesis; metabolism; myelination                                                                       |
| 1451602_at  | Snx6          | NM_026998 | 6.79  | 0.00124    | Sorting nexin 6                                                                   | intracellular protein transport                                                                                        |
| 1416842_at  | Gstm5         | NM_010360 | 7.28  | 0.0000119  | Glutathione S-transferase, mu 5                                                   | metabolism                                                                                                             |
| 1437128_a_a | C730040L01Rik | AK046205  | 8.58  | 0.0000467  | RIKEN cDNA C730040L01 gene                                                        |                                                                                                                        |
| 1451612_at  | Mt1           | NM_013602 | 18.45 | 4.87E-08   | Metallothionein 1                                                                 | metal ion homeostasis; nitric oxide mediated signal transduction; zinc ion homeostasis                                 |

Supp. Table IV

| Symbol     | Cnb1       | Foxa2      | Titf11    |
|------------|------------|------------|-----------|
| Aqp5       | -13.59766  | -2.0876827 | -3.12428  |
| BC005662   | -3.9554483 | -3.8314176 | -2.438277 |
| Cckar      | 2.16372265 | -1.7889088 | 1.9435294 |
| Gsta4      | 1.51970273 | 1.866      | 2.621074  |
| Hc         | -5.0169294 | -11.337868 | -4.270418 |
| Lyzs       | -1.5436105 | -2.0366599 | -2.1202   |
| Lzp-s      | -1.5641306 | -5.5555556 | -1.991255 |
| Pon1       | -15.024086 | -4.0650407 | -20.35411 |
| Rnase4     | -1.6359133 | -1.7006803 | -2.57323  |
| Scd1       | -25.221696 | -14.792899 | -9.733572 |
| Sftpa      | -43.09     | -12.72     | -6.54     |
| Slc34a2    | -4.9167304 | -2.020202  | -2.188111 |
| Zdhhc3     | -1.8062683 | -1.8903592 | -2.580154 |
| 0610040J01 | 1.53590695 | 1.823      | .         |
| 2900093B09 | 3.67672591 | 1.66       | .         |
| 4732452J19 | 1.70072064 | 1.582      | .         |
| 5730593N15 | -1.9330605 | -1.7331023 | .         |
| 9030408N13 | -1.8365175 | -1.9230769 | .         |
| Abca3      | -2.4813346 | -1.8450185 | .         |
| Aldh1a7    | 1.77755272 | 1.568      | .         |
| Aox1       | -1.6069522 | -1.6556291 | .         |
| Atp6v1c2   | -1.7852542 | -1.6207455 | .         |
| Bex2       | -4.2544706 | -15.673981 | .         |
| Bmp1       | 1.82623808 | 1.708      | .         |
| Cdh16      | 2.71125033 | 2.582      | .         |
| Cst8       | -2.5025795 | -2.9069767 | .         |
| Cyp4v3     | -2.4467775 | -1.7699115 | .         |
| Ddc        | -4.6612611 | -1.6722408 | .         |
| Dlk1       | -2.1415354 | -2.9498525 | .         |
| Fabp4      | 1.99067583 | 2.212      | .         |
| Fgfr2      | -1.6994399 | -1.6694491 | .         |
| Foxa1      | 1.80263399 | 1.945      | .         |
| Gdpd2      | -3.5337953 | -1.6393443 | .         |
| Gjb6       | -3.509747  | -3.5714286 | .         |
| Gpam       | -1.5640689 | -1.6638935 | .         |
| Gpr56      | 2.95172889 | 1.74       | .         |
| Grpel2     | 2.10052762 | 2.519      | .         |
| Gstm5      | 7.28056326 | 8.821      | .         |
| Gstt1      | 2.14842253 | 1.575      | .         |
| Gstt3      | 1.74333695 | 1.872      | .         |
| Gtl2       | -1.6862925 | -2.0576132 | .         |
| Hmga2      | 1.91511408 | 1.694      | .         |
| Hmgcs1     | -1.5796981 | -1.7006803 | .         |
| Itga7      | 2.1112114  | 1.886      | .         |
| Itga9      | -1.8796782 | -1.5822785 | .         |
| Ldlr       | -1.8870322 | -1.5060241 | .         |
| Mt1        | 18.4537443 | 5.623      | .         |
| Mtac2d1    | -1.7638195 | 1.525      | .         |
| Myh6       | 1.54246899 | 2.361      | .         |
| Pim1       | 3.62       | 1.614      | .         |
| Pla2g1b    | 3.56813119 | 2.144      | .         |
| Plekhk1    | -3.6680805 | -1.6313214 | .         |
| Pygb       | 1.58186329 | 1.837      | .         |
| Rab27a     | -1.8755537 | -1.7152659 | .         |
| Retnla     | -7.3683145 | -2.1691974 | .         |
| S100a14    | -1.9149669 | -1.8939394 | .         |
| Scel       | -1.6120619 | -2.1008403 | .         |

|            |            |            |           |
|------------|------------|------------|-----------|
| Scin       | -1.6944307 | -1.9646365 | .         |
| Sftpb      | -2.5675918 | -1.6393443 | .         |
| Slc12a5    | -1.8953234 | -1.8621974 | .         |
| Smoc2      | 1.90859479 | 1.532      | .         |
| Synpo      | 1.57161762 | 1.643      | .         |
| Tgm1       | -1.7804689 | -1.5479876 | .         |
| Tst        | 1.95008406 | 1.922      | .         |
| Vnn1       | -2.9356117 | -1.9083969 | .         |
| Zfp52      | 1.52169891 | 2.16       | .         |
| 1200008O12 | .          | -1.6750419 | 2.3084064 |
| 6530401D17 | .          | 1.612      | -3.314454 |
| Car8       | .          | -2.0408163 | -2.305594 |
| Edil3      | .          | -1.5822785 | -3.120172 |
| li         | .          | 2.388      | 1.9064244 |
| Kif2c      | .          | -1.5037594 | 2.0185999 |
| Mlc1       | .          | 1.93       | -3.020604 |
| Pcx        | .          | 1.585      | -2.127272 |
| Plscr2     | .          | 2.021      | -3.823655 |
| Pnliprp1   | .          | -10.695187 | 2.1084799 |
| Pvrl3      | .          | 1.645      | -2.257927 |
| Rrm2       | .          | -1.8903592 | 3.9290502 |
| Scgb1a1    | .          | -3.003003  | -3.377231 |
| Sftpd      | .          | 1.678      | 1.5300821 |
| Slc6a14    | .          | 1.97       | -2.529342 |
| 1190002H23 | -1.8012873 | .          | -3.02612  |
| 2310046K01 | -1.6493628 | .          | -2.13891  |
| 5430416O09 | -1.6217703 | .          | -2.188478 |
| 6330415F13 | -1.5689371 | .          | -2.080249 |
| 9630044O09 | 1.54395812 | .          | 2.8303028 |
| Aqp1       | -1.5336705 | .          | -4.360525 |
| Calb3      | -4.1218266 | .          | -9.189717 |
| Car4       | -2.1795504 | .          | -3.069074 |
| Cd14       | 1.79773292 | .          | 2.306142  |
| Cdkn2b     | -2.3159481 | .          | -4.121626 |
| Clic5      | -2.1656251 | .          | -2.961609 |
| Ear1       | 1.86110888 | .          | -3.213657 |
| Emp2       | -1.6771732 | .          | -2.300317 |
| Enpp2      | -1.6217545 | .          | -2.453219 |
| Evi1       | 1.72365107 | .          | 1.4384804 |
| Fxyd3      | 2.50079509 | .          | 3.2666573 |
| Hck        | -1.7989307 | .          | -2.534641 |
| Ier3       | -1.8487108 | .          | -2.157818 |
| Lcn2       | -2.0933698 | .          | 4.758385  |
| Lrp2       | -2.0360357 | .          | -4.836787 |
| Matn4      | -1.6844828 | .          | -3.538602 |
| Pard6b     | -1.5880964 | .          | -3.398555 |
| Pr1        | -1.8004246 | .          | -3.124577 |
| Scnn1g     | -2.0073511 | .          | -8.958706 |
| Serpnb6b   | -1.6581997 | .          | -2.705273 |
| Serpnb9    | -1.7860088 | .          | -2.795924 |
| Tshb       | -2.6340968 | .          | -12.60515 |
| Ugt8       | 5.22005472 | .          | 2.4342933 |

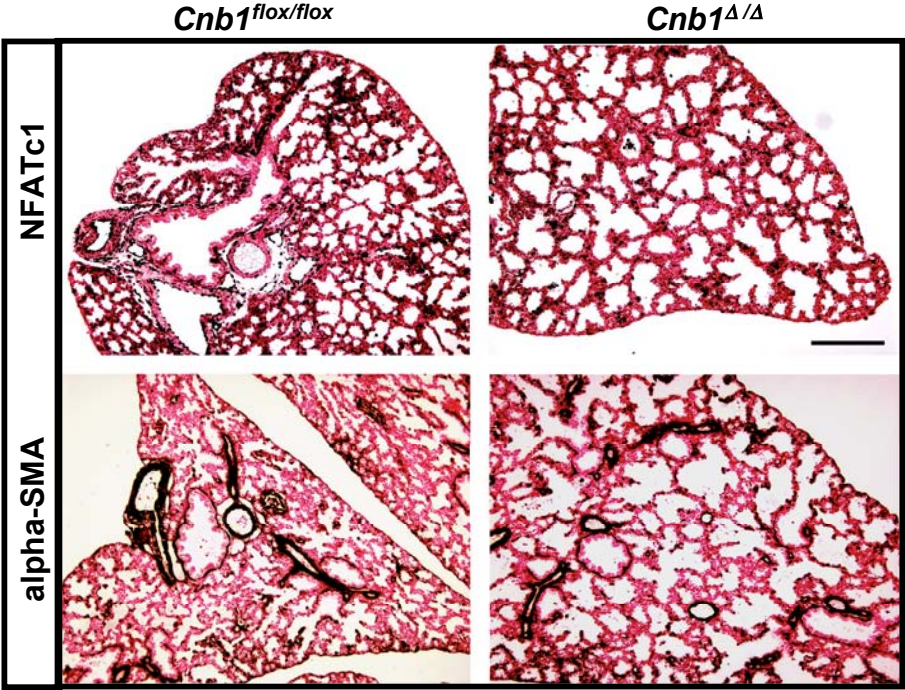

## **SUPPLEMENTARY FIGURE LEGEND**

**Supplementary Figure 1:** NFATc1 staining of the pulmonary vascular endothelium revealed normal capillary bed in close apposition to the epithelial cells in control (*Cnb1<sup>flx/flx</sup>*) mice. In lungs of *Cnb1<sup>Δ/Δ</sup>* mice, while NFATc1 staining was observed, the pulmonary capillaries were less developed and were embedded in thick mesenchyme at E18.5.  $\alpha$ -SMA staining was unaltered; suggesting that lack of CNB1 in the respiratory epithelial cells does not affect the formation of pulmonary arteries and bronchiolar smooth muscle development at E18.5. Scale = 200  $\mu$ m.
